# Supplementary material
Source: PubMed Central journal article supplement (PMC5398560)
Supplement: NIHMS853735-supplement-1.pdf [file NIHMS853735-supplement-1.pdf]

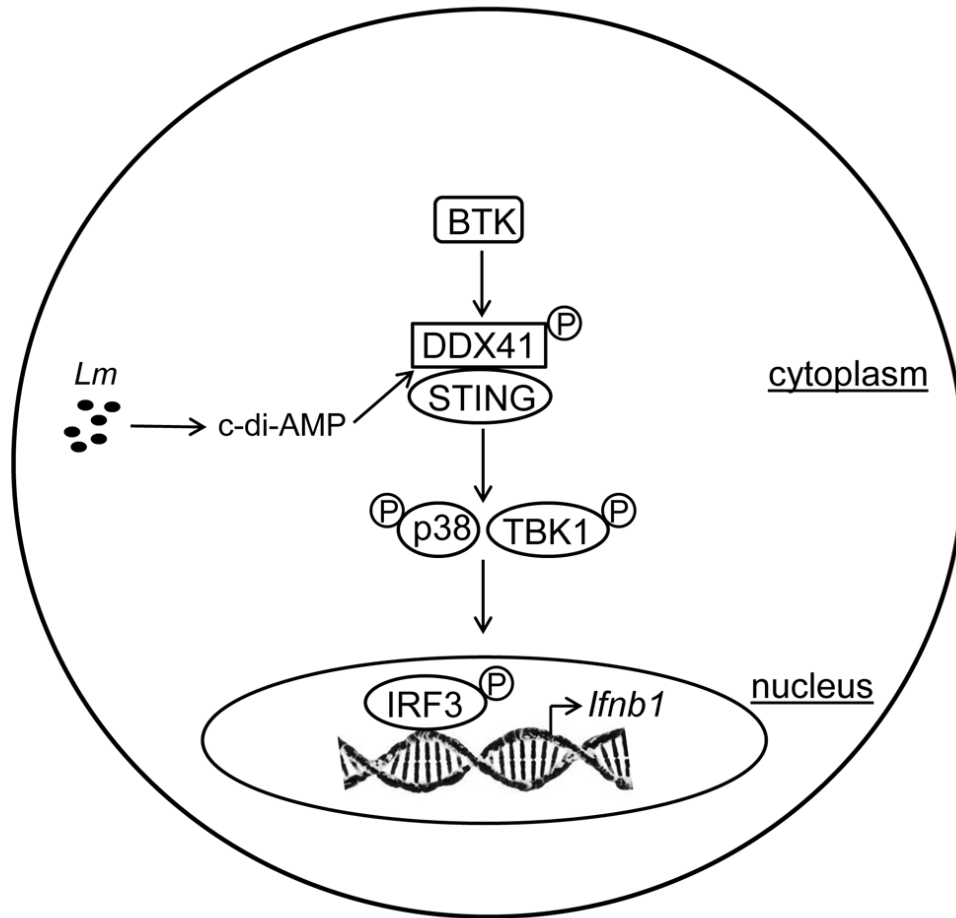

**Supplemental Fig. 1. Schematic diagram of the cytosolic CDN signaling pathway that mediates IFN- $\beta$  production in *Listeria monocytogenes* infected cells.** Phosphorylated proteins in the pathway are depicted by circled Ps. Lm, *Listeria monocytogenes*; BTK, Bruton's Tyrosine Kinase; DDX41, DEAD-Box Helicase 41; STING, Stimulator of Interferon Genes; TBK1, TANK-Binding Kinase 1; IRF3, interferon regulatory factor 3; Ifnb1, interferon beta transcript.
